# Supplementary material for: Analysis of a native whitefly transcriptome and its sequence divergence with two invasive whitefly species
Source: PubMed Central journal article supplement (PMC3478168; doi:10.1186/1471-2164-13-529), 2012-10-04
Supplement: 1471-2164-13-529-S1.pdf [file 1471-2164-13-529-S1.pdf]

**Additional file 1: Summary of Asia II 3, MEAM1 and MED transcriptomes**

|                                           | Asia II 3     | MEAM1         | MED           |
|-------------------------------------------|---------------|---------------|---------------|
| Total number of reads                     | 16,871,140    | 17,049,500    | 43,731,400    |
| Total base pairs (bp)                     | 1,248,464,360 | 1,278,712,500 | 3,279,855,000 |
| Average read length (bp)                  | 74            | 75            | 75            |
| Total number of contigs                   | 144,103       | 123,055       | 4,274,766     |
| Mean length of contigs ( bp)              | 201           | 269           | 40            |
| Total number of scaffolds                 | 77,263        | 104,722       | 170,115       |
| Mean length of scaffolds (bp)             | 359           | 326           | 266           |
| Distinct sequences                        | 52,535        | 57,741        | 168,900       |
| Sequences with E-value < 10 <sup>-5</sup> | 15,357        | 15,922        | 27,290        |
