# Supplementary material for: Analysis of a native whitefly transcriptome and its sequence divergence with two invasive whitefly species
Source: PubMed Central journal article supplement (PMC3478168; doi:10.1186/1471-2164-13-529), 2012-10-04

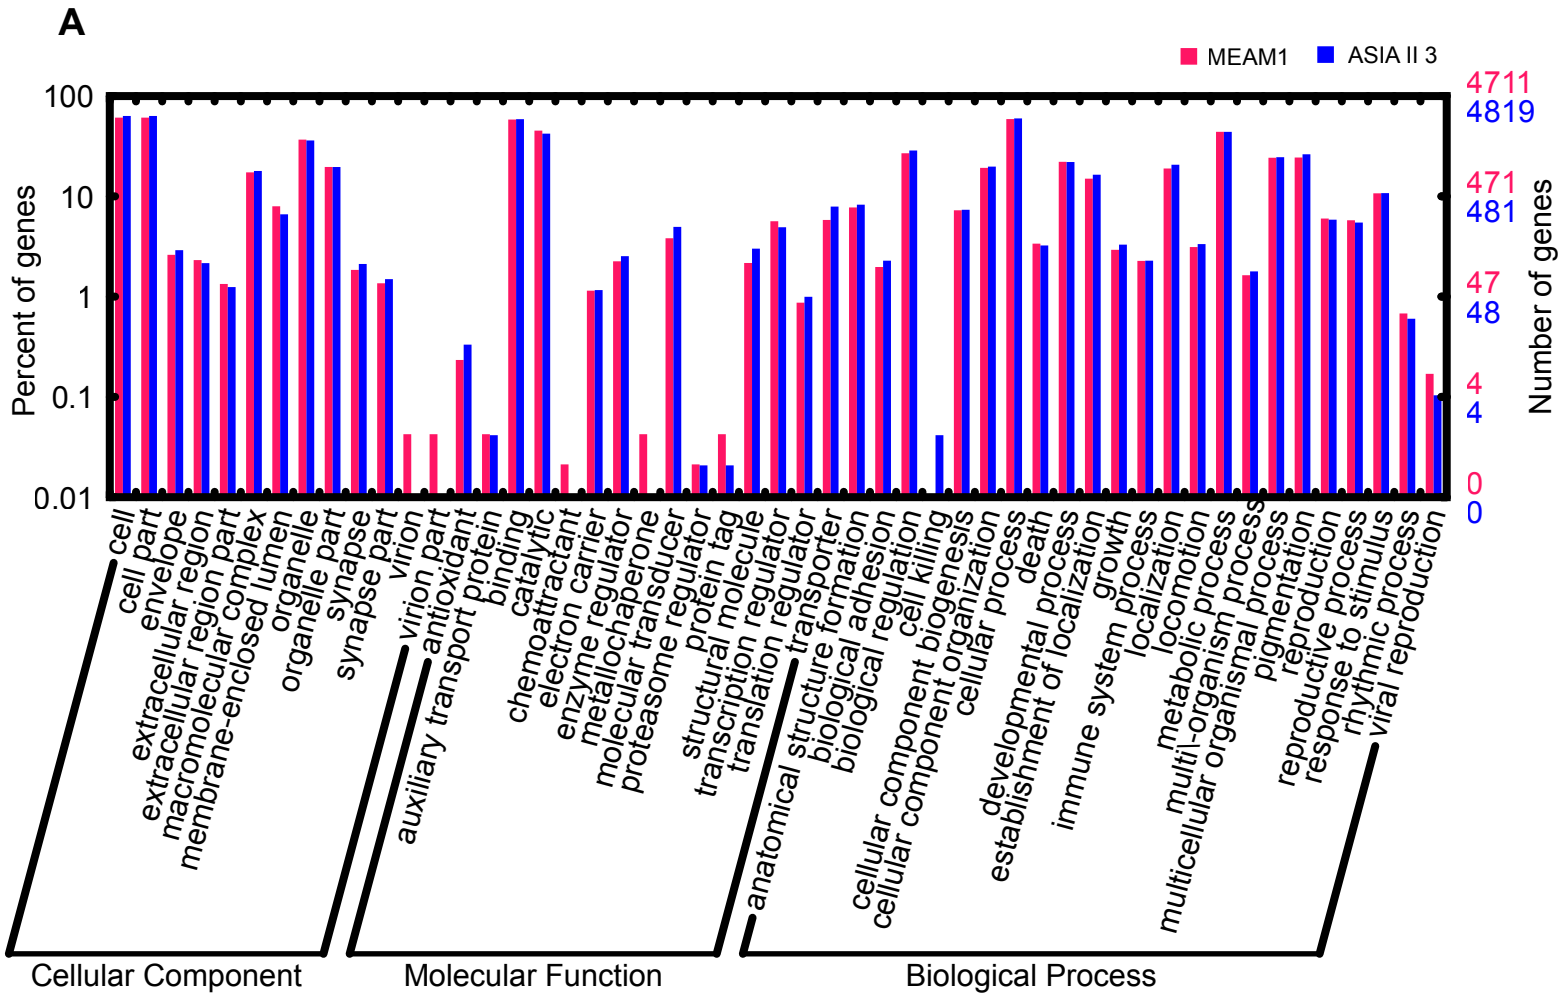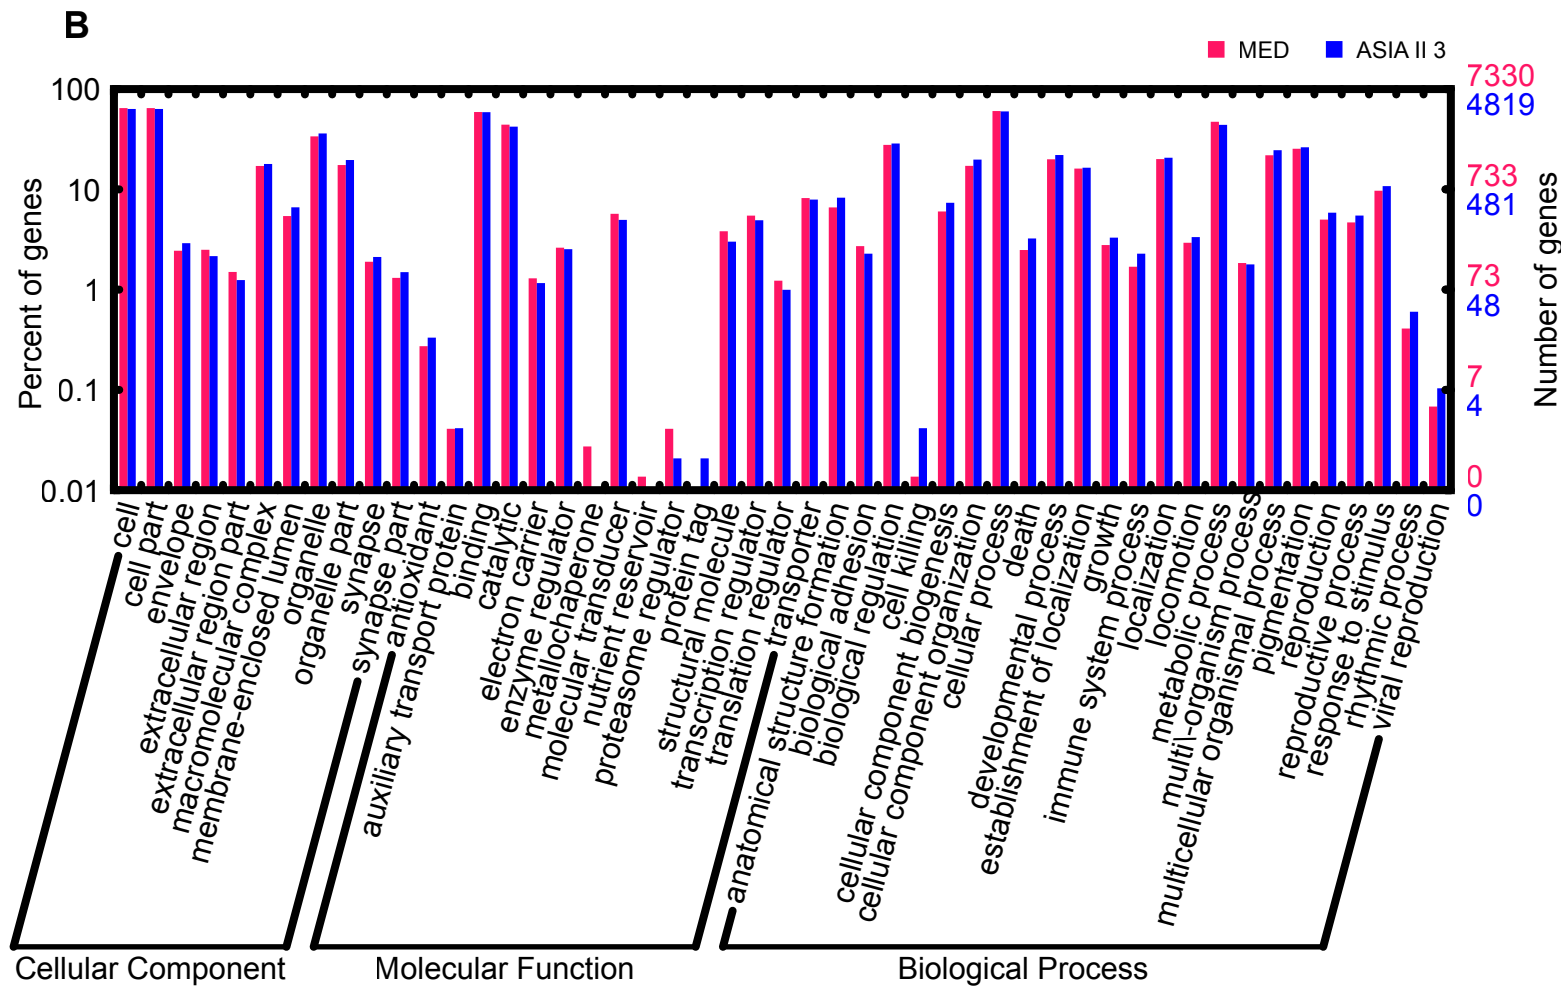

Supplement: 1471-2164-13-529-S3.pdf [file 1471-2164-13-529-S3.pdf]
