# Supplementary material for: Analysis of a native whitefly transcriptome and its sequence divergence with two invasive whitefly species
Source: PubMed Central journal article supplement (PMC3478168; doi:10.1186/1471-2164-13-529), 2012-10-04
Supplement: 1471-2164-13-529-S6.pdf [file 1471-2164-13-529-S6.pdf]

Additional file 6: Sequence divergence between Asia II 3 and MED transcriptomes

|                       | % CpG | % GC  | Loci | % Differences |      | Compared<br>kb | ts/tv <sup>e</sup> |
|-----------------------|-------|-------|------|---------------|------|----------------|--------------------|
|                       |       |       |      | mean          | SE   |                |                    |
| 5' UTRs <sup>a</sup>  | 7.48  | 37.44 | 102  |               |      |                |                    |
| All                   |       |       |      | 3.57          | 0.27 | 10.92          | 1.25               |
| No CpG                |       |       |      | 3.14          | 0.25 | 10.11          | 1.10               |
| CpG                   |       |       |      | 9.84          | 1.50 | 0.82           | 2.29               |
| CDS <sup>b</sup>      | 7.53  | 43.93 | 2529 |               |      |                |                    |
| All                   |       |       |      | 1.84          | 0.03 | 1072.12        | 2.70               |
| No CpG                |       |       |      | 1.38          | 0.03 | 991.42         | 2.36               |
| CpG                   |       |       |      | 8.06          | 0.14 | 80.70          | 3.69               |
| nd sites <sup>c</sup> | 6.60  | 44.42 | 2529 |               |      |                |                    |
| All                   |       |       |      | 0.49          | 0.02 | 628.75         | 1.31               |
| No CpG                |       |       |      | 0.44          | 0.02 | 587.25         | 1.17               |
| CpG                   |       |       |      | 1.26          | 0.08 | 41.50          | 2.34               |
| 4d sites <sup>d</sup> | 12.93 | 39.29 | 2529 |               |      |                |                    |
| All                   |       |       |      | 5.58          | 0.09 | 152.04         | 2.00               |
| No CpG                |       |       |      | 3.64          | 0.08 | 132.38         | 1.48               |
| CpG                   |       |       |      | 20.83         | 0.43 | 19.66          | 3.06               |
| 3' UTRs               | 4.62  | 36.27 | 102  |               |      |                |                    |
| All                   |       |       |      | 3.13          | 0.29 | 15.54          | 1.61               |
| No CpG                |       |       |      | 2.74          | 0.27 | 14.82          | 1.34               |
| CpG                   |       |       |      | 13.66         | 1.85 | 0.72           | 4.30               |

<sup>a</sup>UTRs: untranslated regions.

<sup>b</sup>CDS: coding sequence.

<sup>c</sup>nd sites: non-degenerative sites.

<sup>d</sup>4d sites: fourfold-degenerate sites where no changes cause any amino acid replacement.

<sup>e</sup>ts/tv: ration of transitions (ts) over transversions (tv).
